# Supplementary material for: Meta-analyzing intelligence and religiosity associations: Evidence from the multiverse
Source: PubMed Central journal article supplement (PMC8836311; doi:10.1371/journal.pone.0262699), 2022-02-11

**rstudent**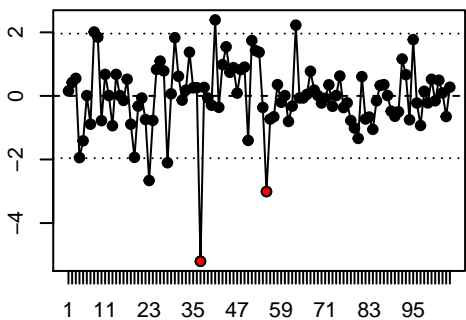**dffits**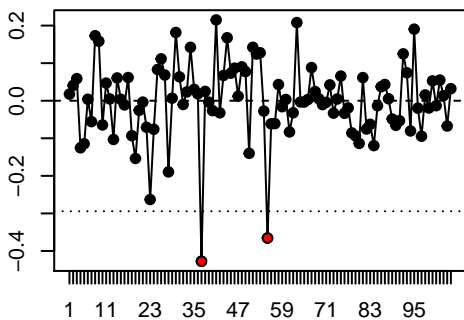**cook.d**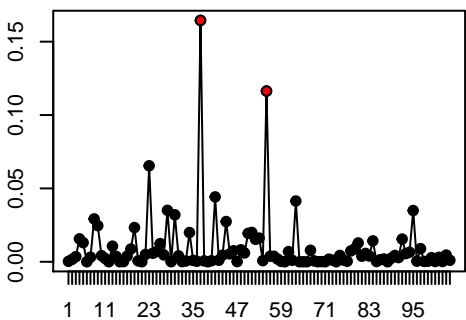**cov.r**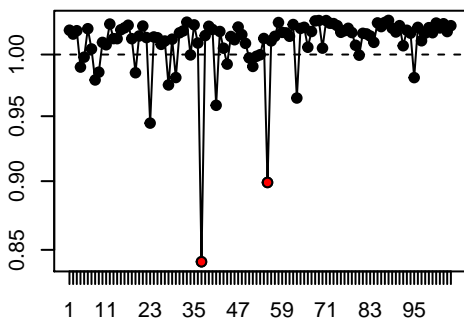**tau2.del**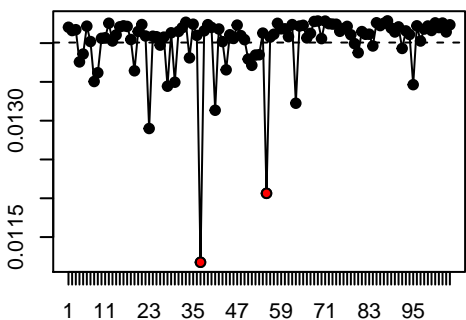**QE.del**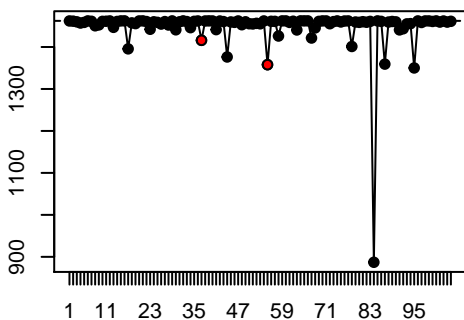**hat**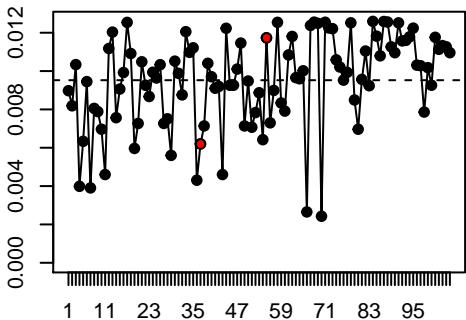**weight**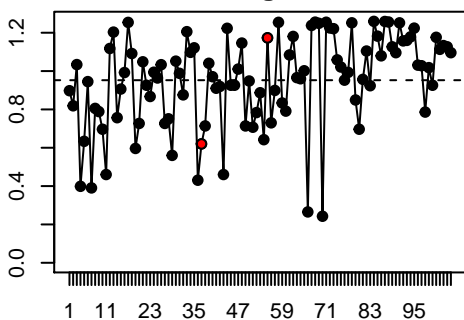

Supplement: pone.0262699.s005.pdf [file pone.0262699.s005.pdf]
